# Supplementary material for: Multiscale 3D microfluidic platform for intraorganoid delivery
Source: Research Square preprint supplement (doi:10.21203/rs.3.rs-8436544/v1), 2026-01-27
Supplement: Supplementary file 1 [file f898ad7d20b099c726818055.pdf]

Supplementary Information for:

## Multiscale 3D microfluidic platform for intraorganoid delivery

**Author List:** Maria Jose Quezada<sup>1,2,3†</sup>, Jamin Lee<sup>1,4,5,6†</sup>, Zengyao Lv<sup>7†</sup>, Khizar Nandoliya<sup>8†</sup>, Ingrid Cheung<sup>1,9†</sup>, Qiong Wang<sup>6,†</sup>, Woo-Yeol Maeng<sup>6</sup>, Naijia Liu<sup>6</sup>, Amir Vahabikashi<sup>10</sup>, Kyoung-Ho Ha<sup>6</sup>, Yong-Woo Kang<sup>6</sup>, Dae-Hyeon Song<sup>11</sup>, Yuming Huang<sup>6</sup>, Clara Asseily<sup>2</sup>, Rakan Walid da Cruz<sup>2</sup>, Shreyaa Khanna<sup>1</sup>, Jintao Liu<sup>12,13</sup>, John D. Finan<sup>14</sup>, Lara Leoni<sup>15</sup>, Daniele Procissi<sup>15</sup>, Yonggang Huang<sup>6,7,16</sup>, Gyu-Chul Yi<sup>4,5</sup>, Juyeol Bae<sup>12,13\*</sup>, John A. Rogers<sup>2,6,16\*</sup> & Colin K. Franz<sup>1,6,9,17\*</sup>

### Affiliations:

<sup>1</sup>Regenerative Neurorehabilitation Laboratory, Shirley Ryan Ability Lab, Chicago, IL 60611, USA.

<sup>2</sup>Department of Biomedical Engineering, Northwestern University, Evanston, IL 60208, USA.

<sup>3</sup>Department of Physical Therapy and Human Movement Sciences, Northwestern University, Chicago, IL 60611, USA.

<sup>4</sup>Interdisciplinary Program in Neuroscience, College of Science, Seoul National University, Seoul, 08826, South Korea.

<sup>5</sup>Center for Novel Epitaxial Quantum Architectures, Department of Physics and Astronomy, Seoul National University, Seoul, 08826, South Korea.

<sup>6</sup>Querrey Simpson Institute for Bioelectronics, Northwestern University, Evanston, IL, 60208, USA.

<sup>7</sup>Department of Civil and Environmental Engineering, Northwestern University, Evanston, IL 60208, USA.

<sup>8</sup>Department of Neurological Surgery, Feinberg School of Medicine, Northwestern University, Chicago, IL 60611, USA.

<sup>9</sup>Department of Physical Medicine and Rehabilitation, Northwestern University.

<sup>10</sup>Bioengineering Department and Institute for Mechanobiology, Northeastern University, Boston, MA, 02115, USA.

<sup>11</sup>Department of Materials Science and Engineering, Korea Advanced Institute of Science and Technology, Daejeon, 34141, South Korea.

<sup>12</sup>Department of Mechanical Engineering, Chonnam National University, 77 Yongbong-ro, Buk-gu, Gwangju 61186, Republic of Korea.

<sup>13</sup>Advanced Medical Device Research Center for Cardiovascular Disease, Chonnam National University, 77 Yongbong-ro, Buk-gu, Gwangju 61186, Republic of Korea

<sup>14</sup>Department of Mechanical and Industrial Engineering, University of Illinois Chicago, Chicago, IL 60607, USA.

<sup>15</sup>Department of Radiology, Feinberg School of Medicine, Northwestern University, Chicago, IL 60611, USA.

<sup>16</sup>Department of Materials Science and Engineering and Department of Mechanical Engineering, Northwestern University, Evanston, IL 60208, USA.

<sup>17</sup>The Ken and Ruth Davee Department of Neurology, Feinberg School of Medicine, Northwestern University, Chicago, IL 60611, USA.

† These authors contributed equally

\* Corresponding Authors

Correspondence to [Juyeol Bae](#), [John A. Rogers](#) and [Colin K. Franz](#)

|                                                                                                                                                                        |   |
|------------------------------------------------------------------------------------------------------------------------------------------------------------------------|---|
| Supplementary Fig. 1   Fabrication processes for the multiscale 3D microfluidic platform. ....                                                                         | 3 |
| Supplementary Fig. 2   Dimensional characteristics of the planar precursor.....                                                                                        | 4 |
| Supplementary Fig. 3   Mechanical characteristics of the material used for buckling the precursor into 3D microchannel.....                                            | 5 |
| Supplementary Fig. 4   A microfluidic device for multiplexed delivery of solutes at targeted localized region. ....                                                    | 5 |
| Supplementary Fig. 5   Top view of experimental setup for characterizing the mechanism of solute transport through the porous interface into the agarose phantom. .... | 6 |
| Supplementary Table 1   List of antibodies and molecular probes. ....                                                                                                  | 6 |

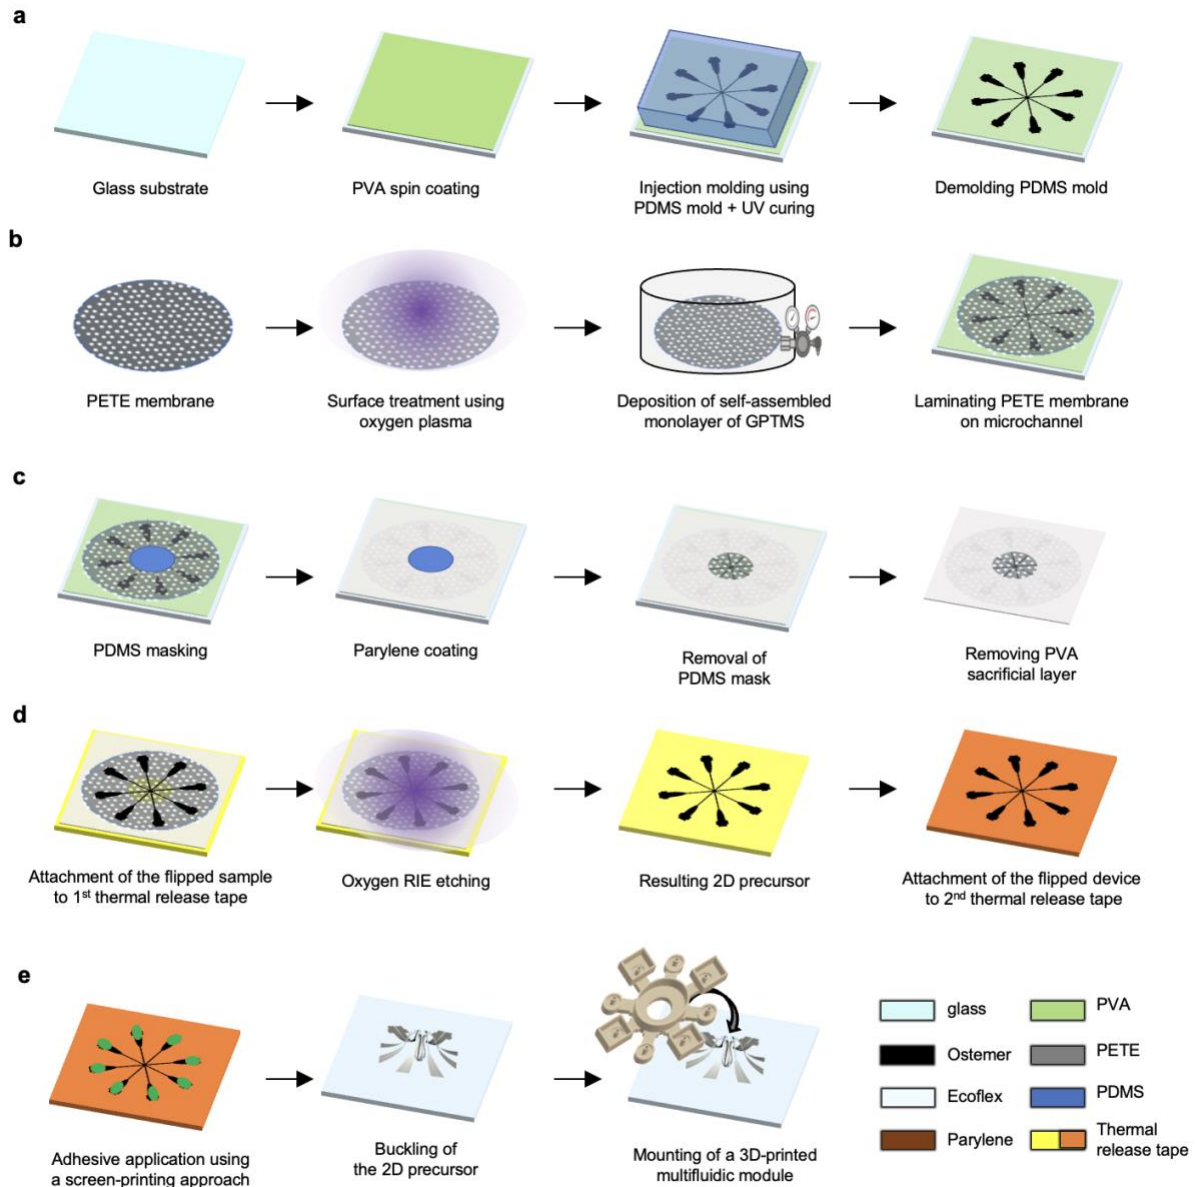

**Supplementary Fig. 1 | Fabrication processes for the multiscale 3D microfluidic platform.**

**a**, Soft-lithography step for preparing microchannel layer. **b**, Lamination step for bonding the PETE membrane onto the prepared microchannel layer. **c**, Deposition step for selectively coating parylene on the surface of the PETE membrane. **d**, Etching step for defining the PETE sheet into the same 2D layout as the microchannel layer. **e**, Packaging step including buckling the 2D precursor and mounting the 3D-printed millifluidic modules onto the periphery of the buckled 3D microchannel.

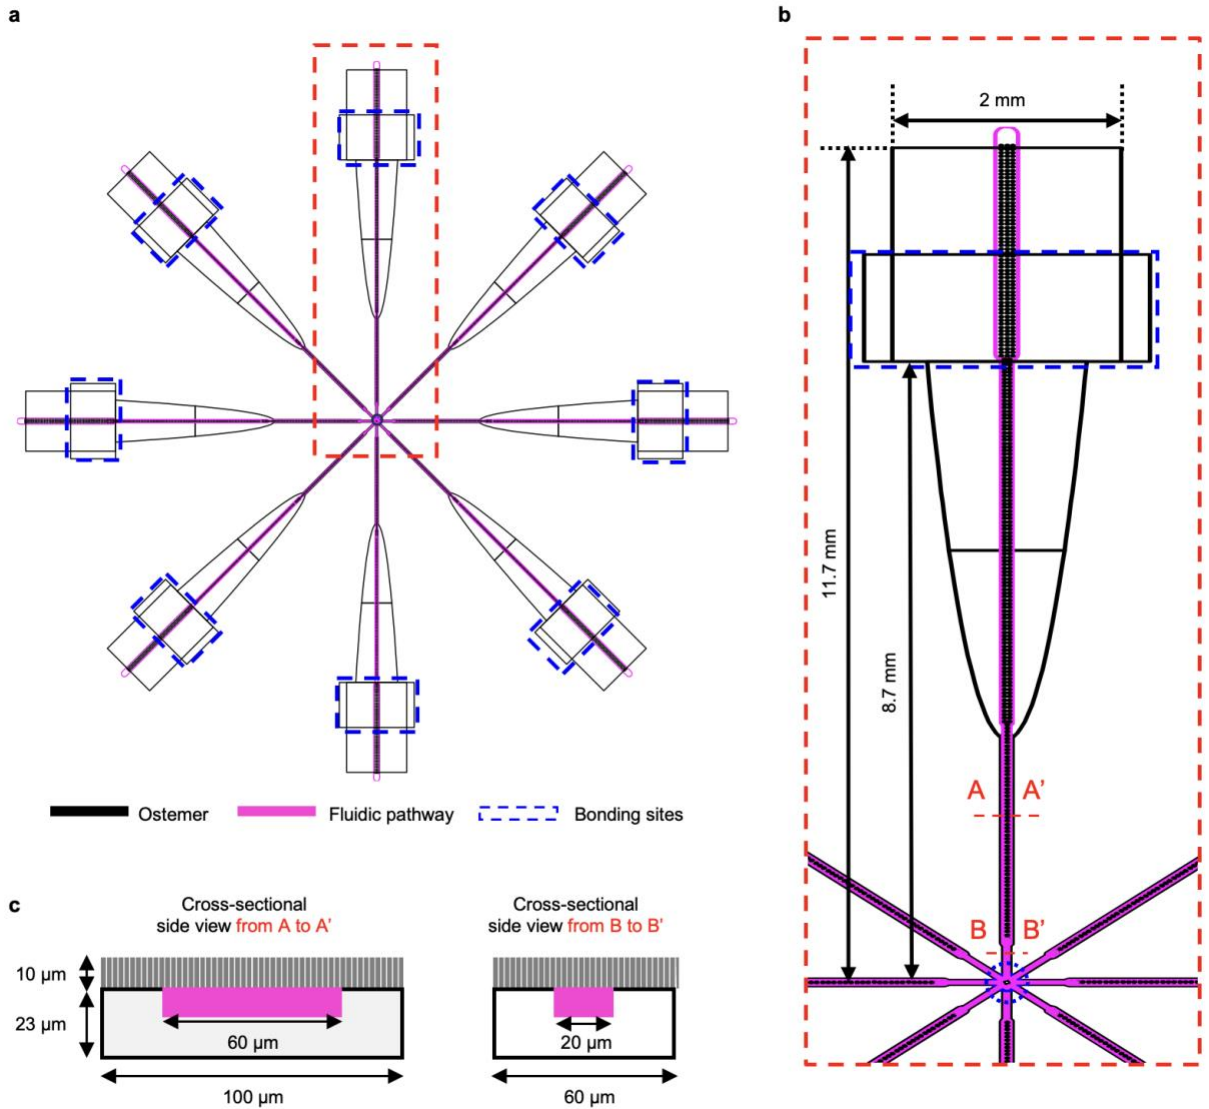

**Supplementary Fig. 2 | Dimensional characteristics of the planar precursor.**

**a**, 2D layout showing the design of the planar precursor. **b**, Enlarged view of a single wing in the 2D layout. **c**, Cross-sectional side views of the planar precursor along lines A–A' and B–B' in the enlarged view of the wing.

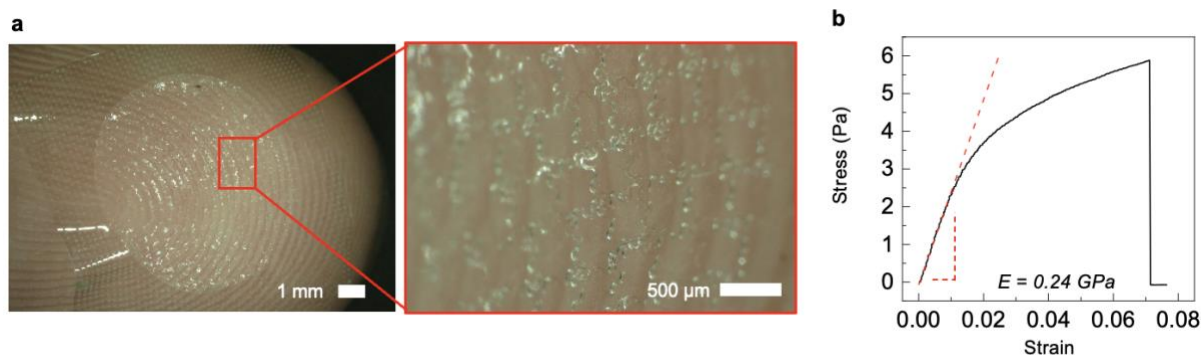

**Supplementary Fig. 3 | Mechanical characteristics of the material used for buckling the precursor into 3D microchannel.**

**a**, Photographs showing an Ostemer microchannel layer placed on a fingerprint. The magnified view reveals that the layer conforms to the fingerprint ridges because the polymer is flexible (Young's modulus of  $10.29 \times 10^6 \text{ N/m}^2$ ). **b** Stress-strain curve obtained from tensile testing of the PETE membrane used to seal the microchannel layer.

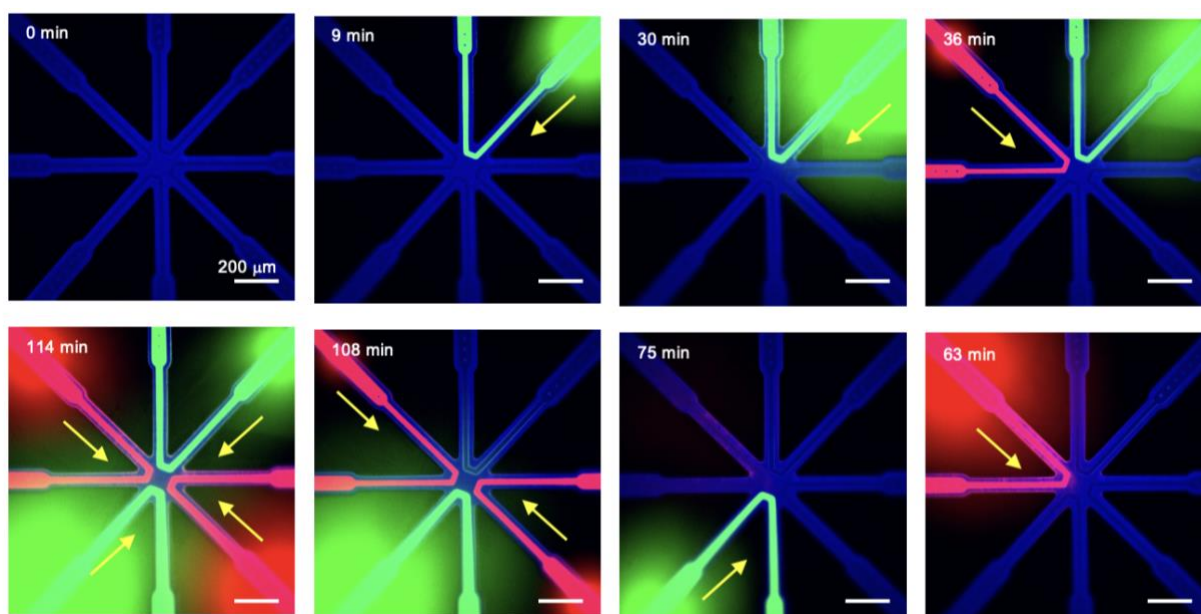

**Supplementary Fig. 4 | A microfluidic device for multiplexed delivery of solutes at targeted**

Time-lapse widefield fluorescence microscopy showing multiplexed spatiotemporal delivery of  $50 \mu\text{M}$  SRB and  $100 \mu\text{M}$  fluorescein isothiocyanate (FITC) into 2-mm-thick 1% agarose. Arrows indicate the flow direction of the solutions from the upstream wing.

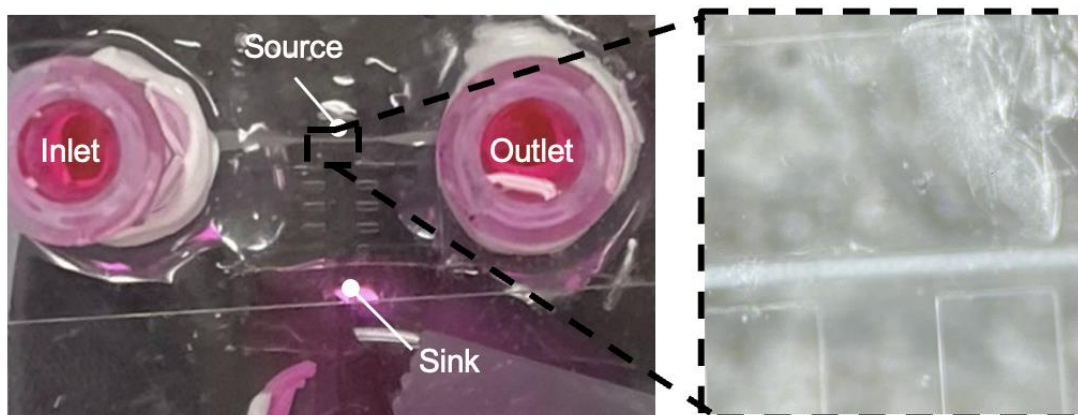

**Supplementary Fig. 5 | Top view of experimental setup for characterizing the mechanism of solute transport through the porous interface into the agarose phantom.**

| Antibody                                                          | Species | Dilution | Catalogue number, Company         |
|-------------------------------------------------------------------|---------|----------|-----------------------------------|
| Olig2                                                             | rabbit  | 1:100    | AB9610, Millipore Sigma           |
| Pax6                                                              | mouse   | 1:200    | ab245110, abcam                   |
| Islet1                                                            | goat    | 1:2000   | AF1837, Bio-Techne                |
| NF Vio R667                                                       | human   | 1:1000   | 130-131-154, Miltenyi Biotec      |
| NeuN Vio R667                                                     | human   | 1:1000   | 130-131-153, Miltenyi Biotec      |
| Goat anti Mouse Alexa Fluor™ 555                                  | mouse   | 1:1000   | A-21424, Thermo Fisher Scientific |
| Donkey anti Rabbit Alexa Fluor™ 647                               | rabbit  | 1:1000   | A-31573, Thermo Fisher Scientific |
| Donkey anti Rabbit Alexa Fluor™ 555                               | rabbit  | 1:1000   | A-31572, Thermo Fisher Scientific |
| Donkey anti Goat Alexa Fluor™ 555                                 | goat    | 1:1000   | A-21432, Thermo Fisher Scientific |
| DAPI                                                              |         | 1:50     | D1306, Invitrogen                 |
| DRAQ5                                                             |         | 1:100    | ab108410, Abcam                   |
| Cholera Toxin Subunit B (Recombinant), Alexa Fluor™ 555 Conjugate |         | 1:100    | C22843, Invitrogen                |

**Supplementary Table 1 | List of antibodies and molecular probes.**
